# Supplementary material
Source: PubMed Central journal article supplement (PMC168981)

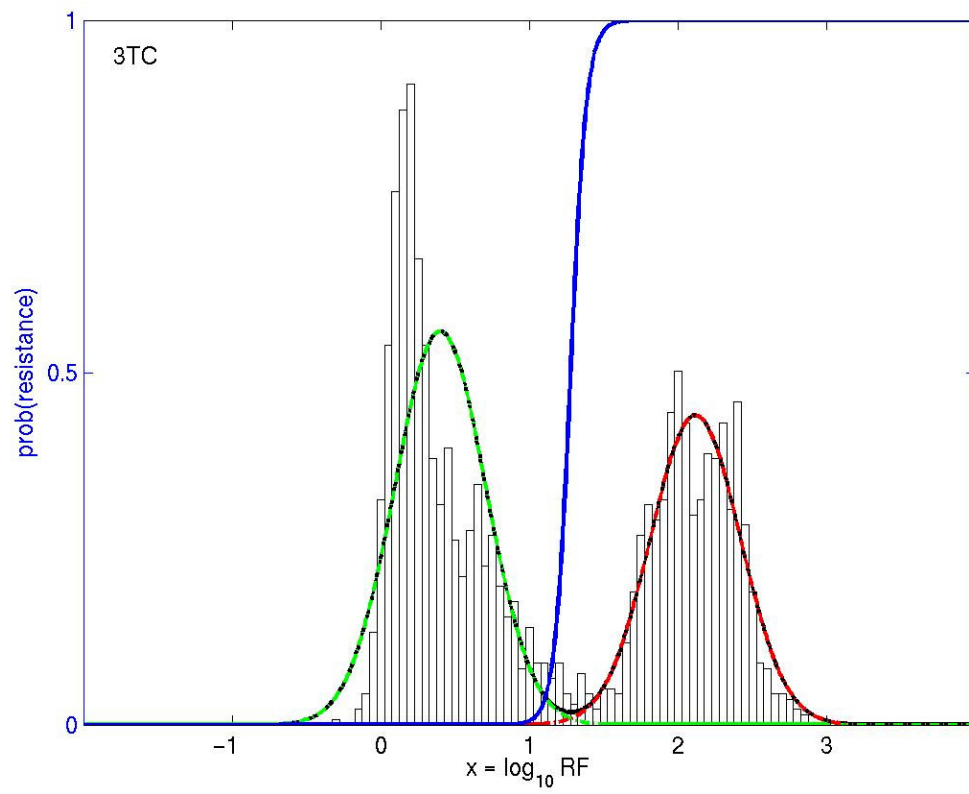

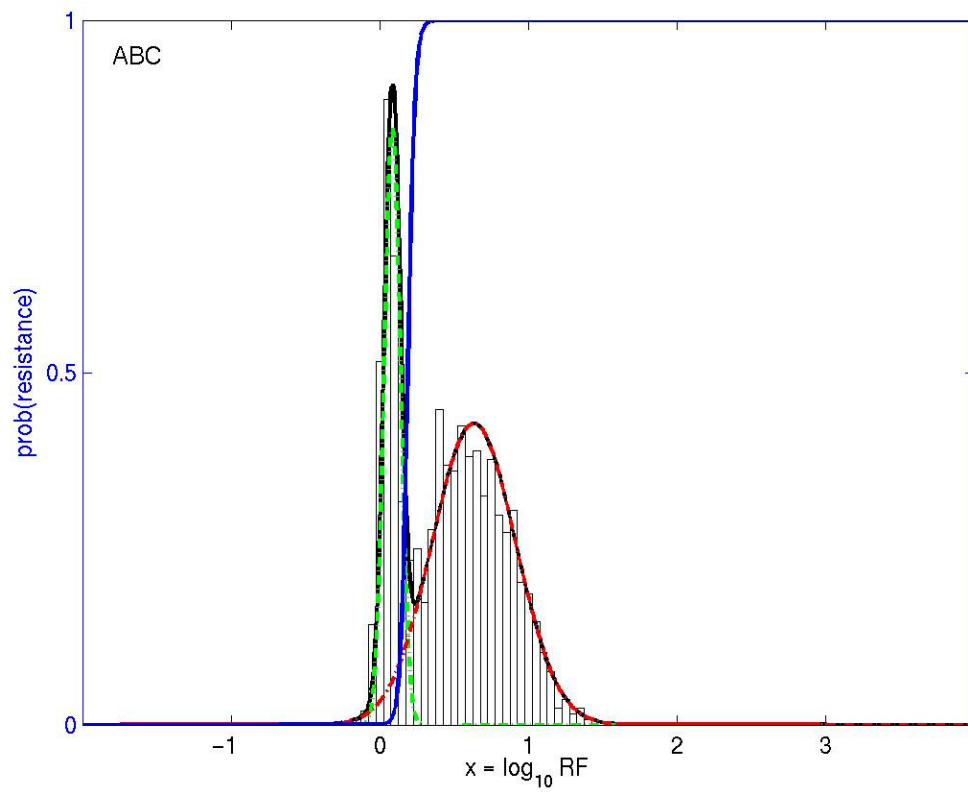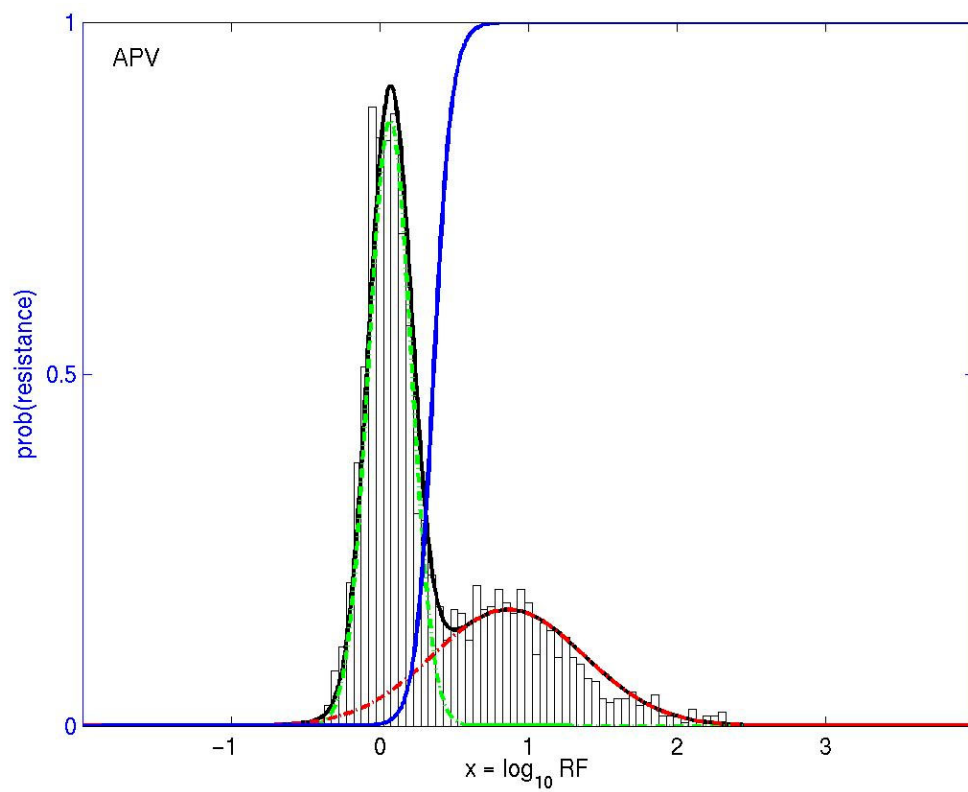

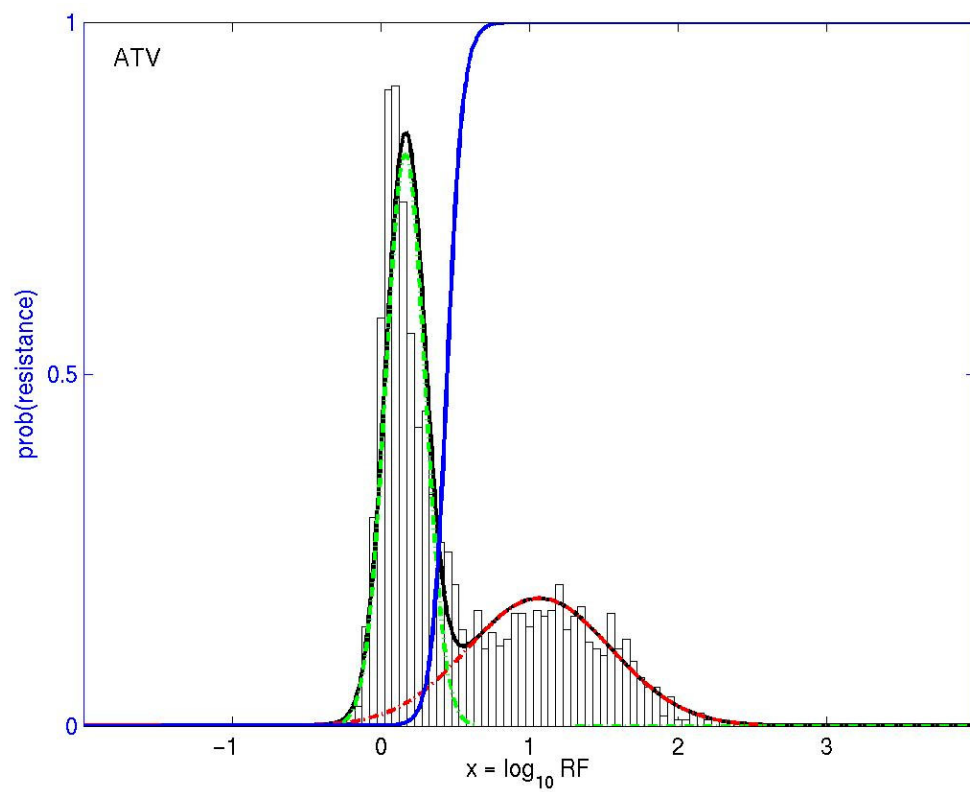

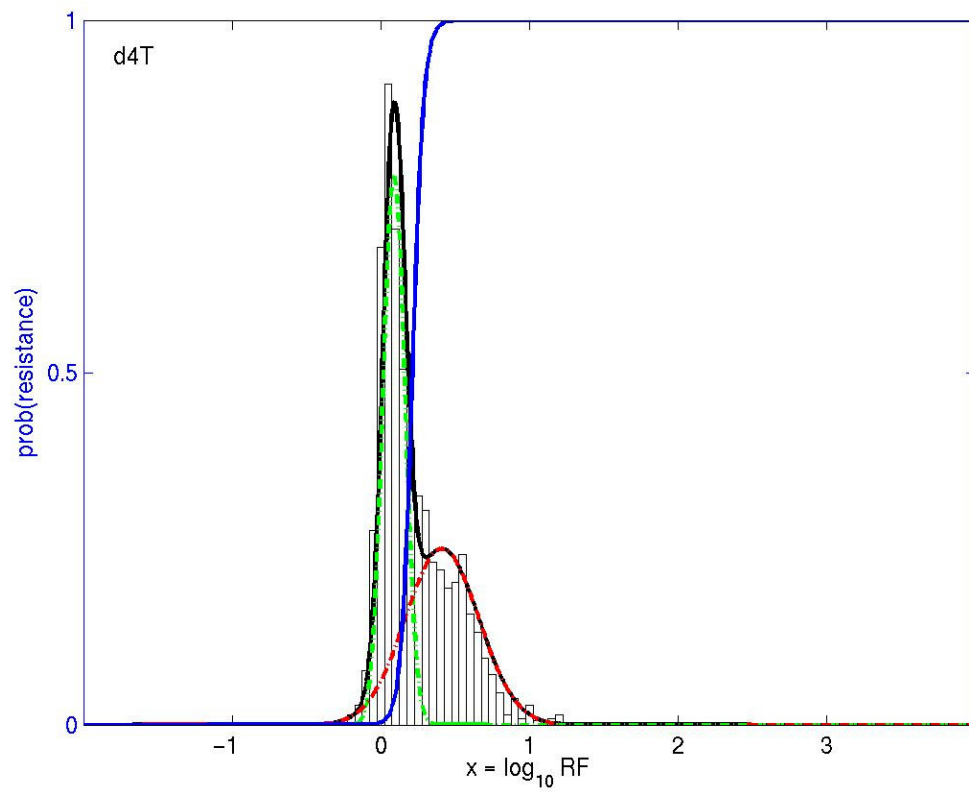

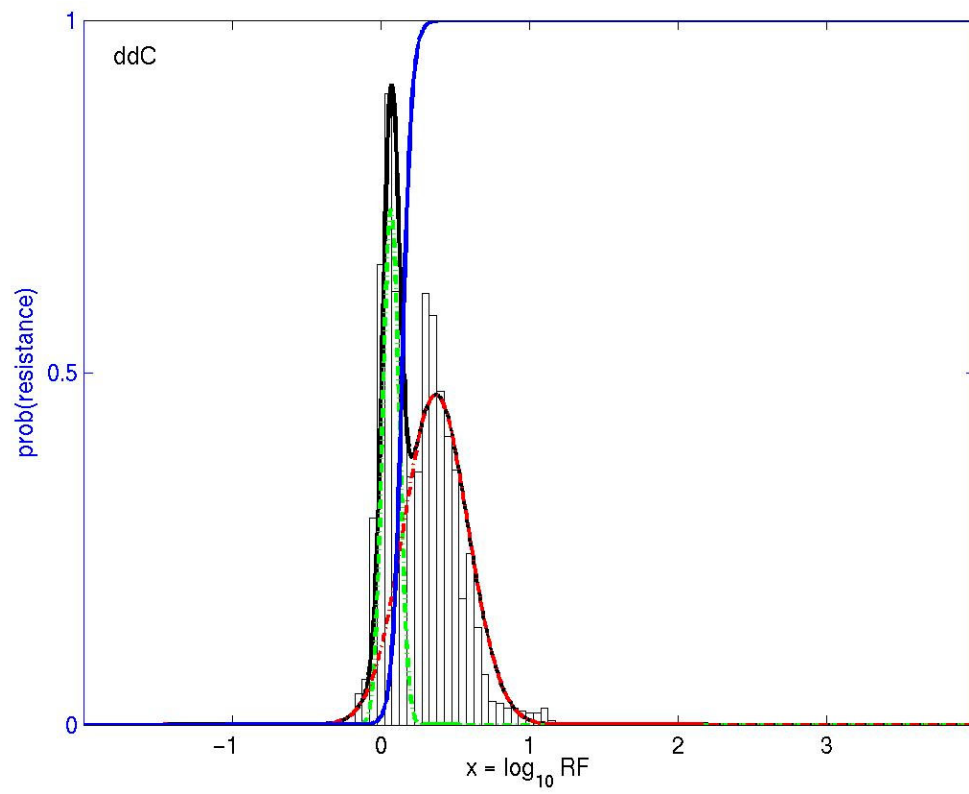

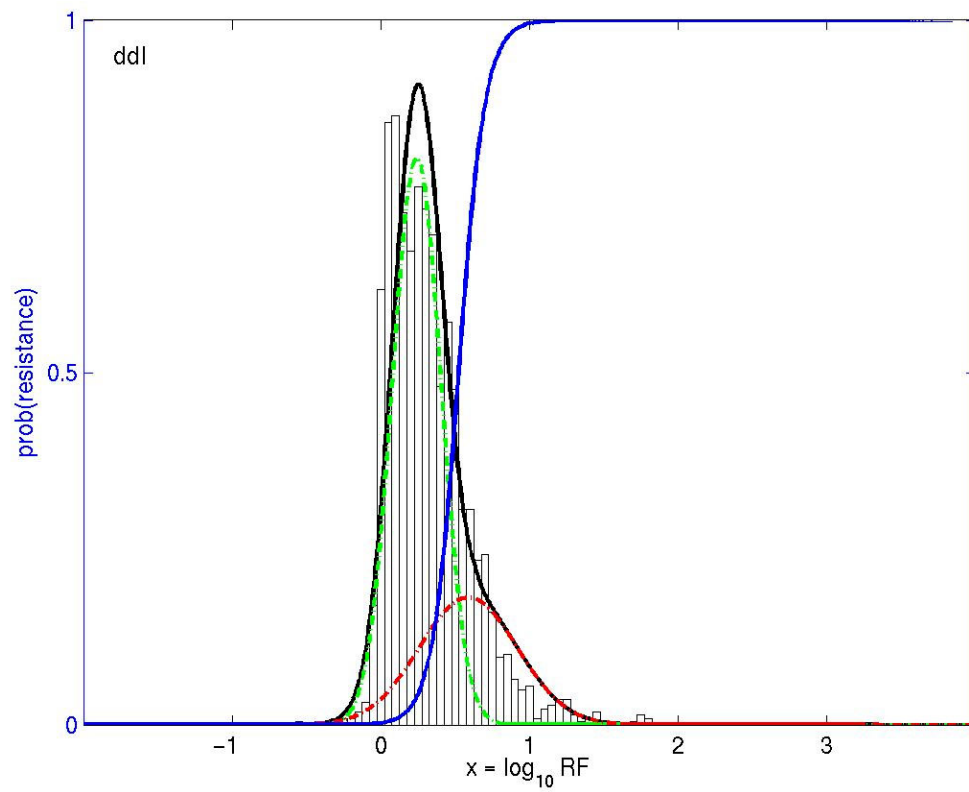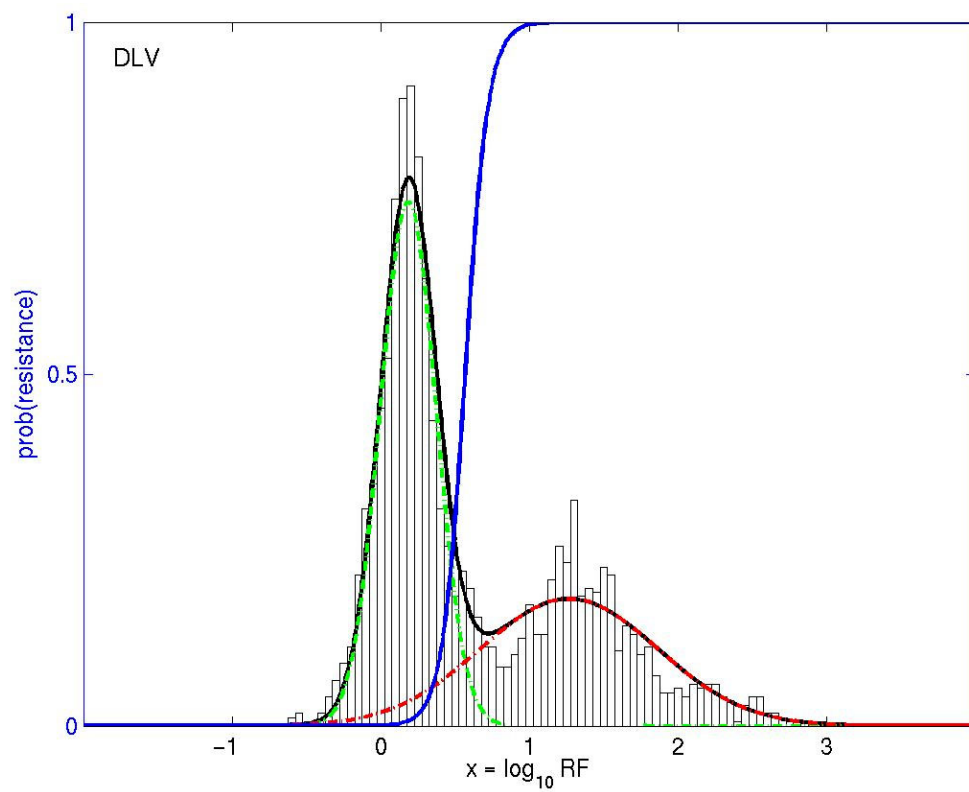

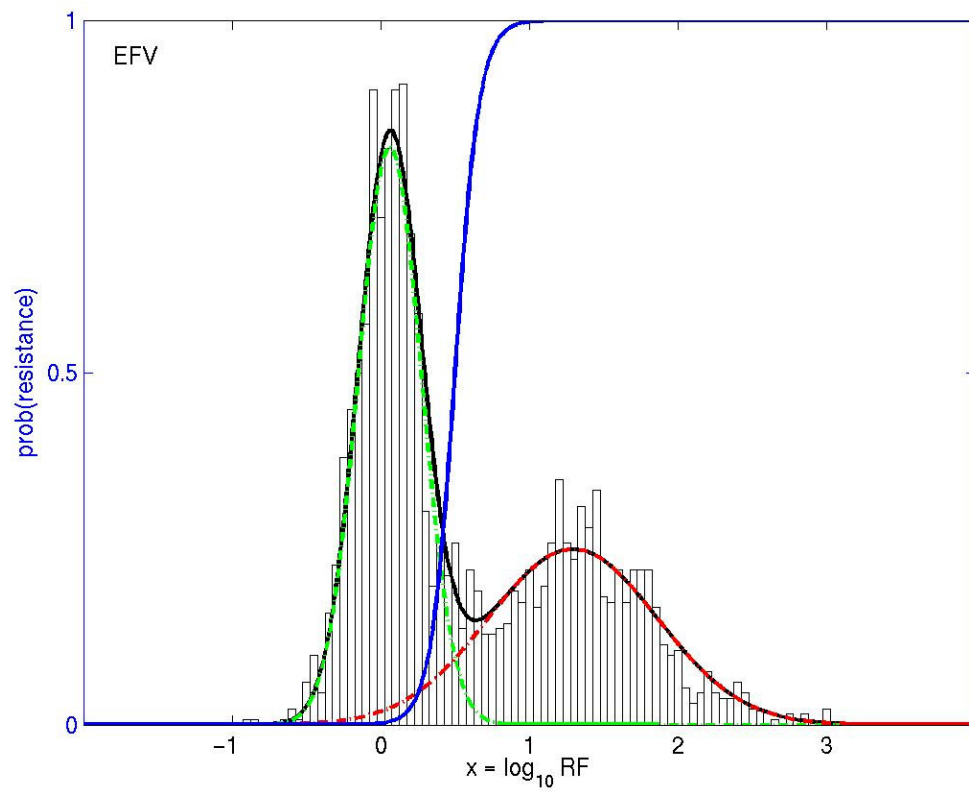

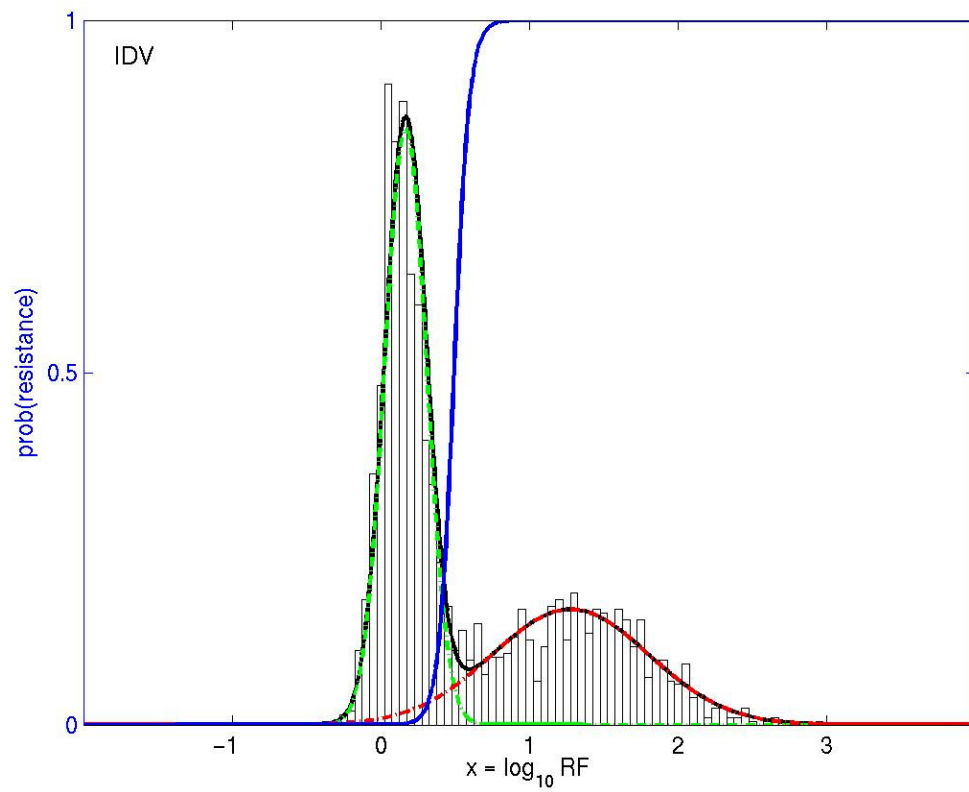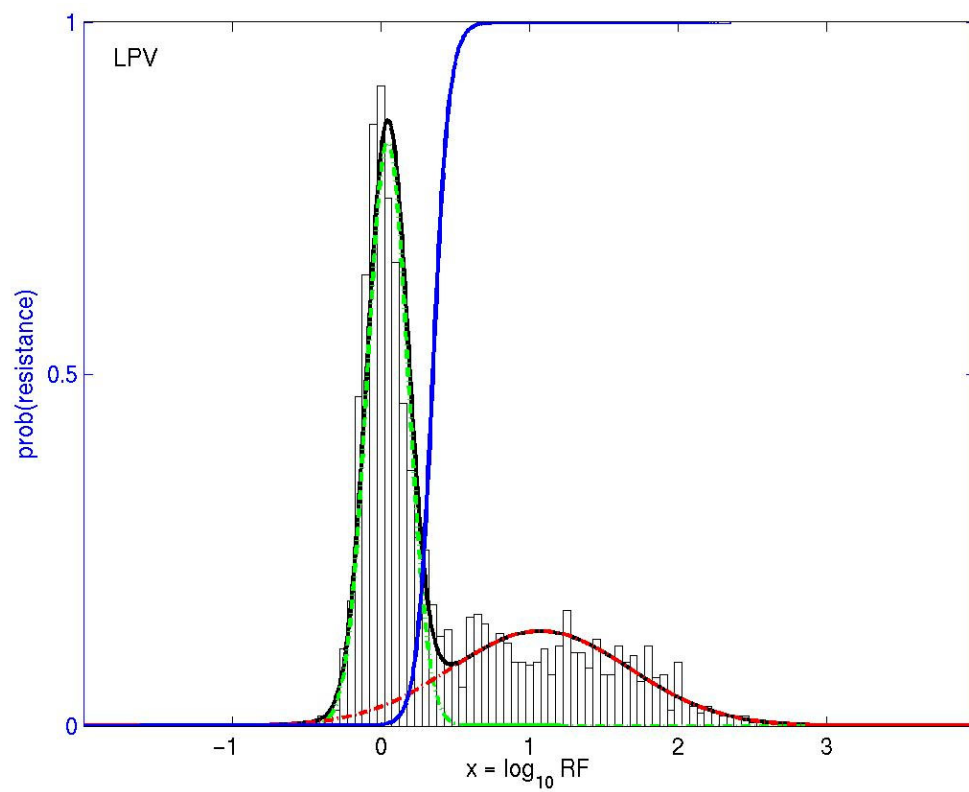



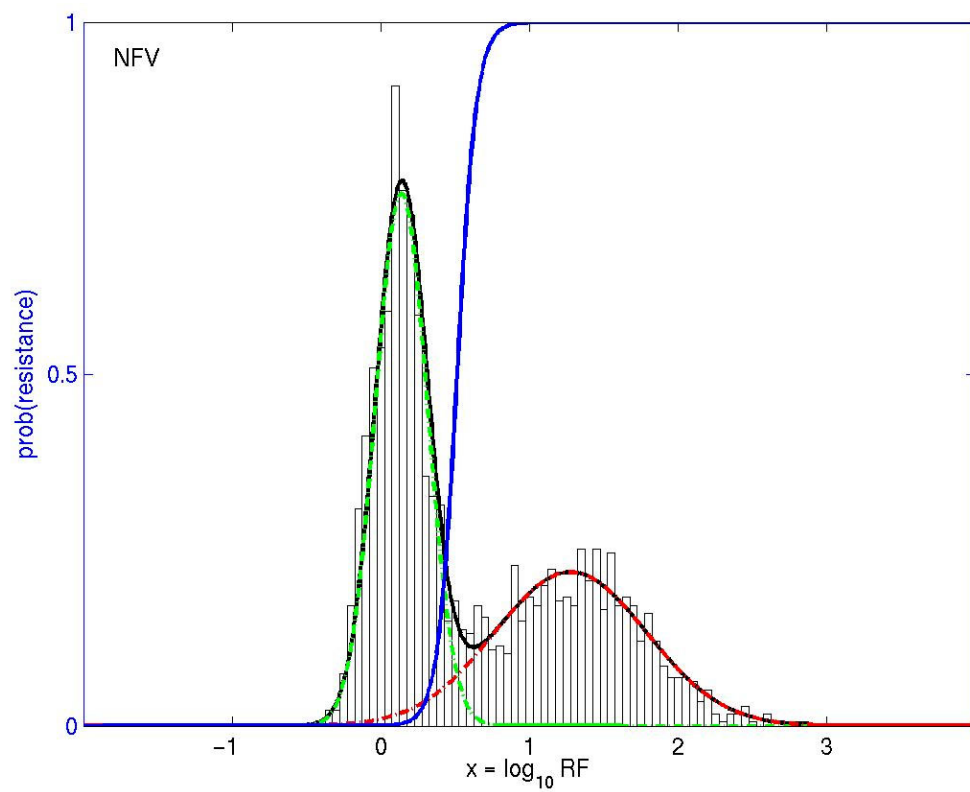

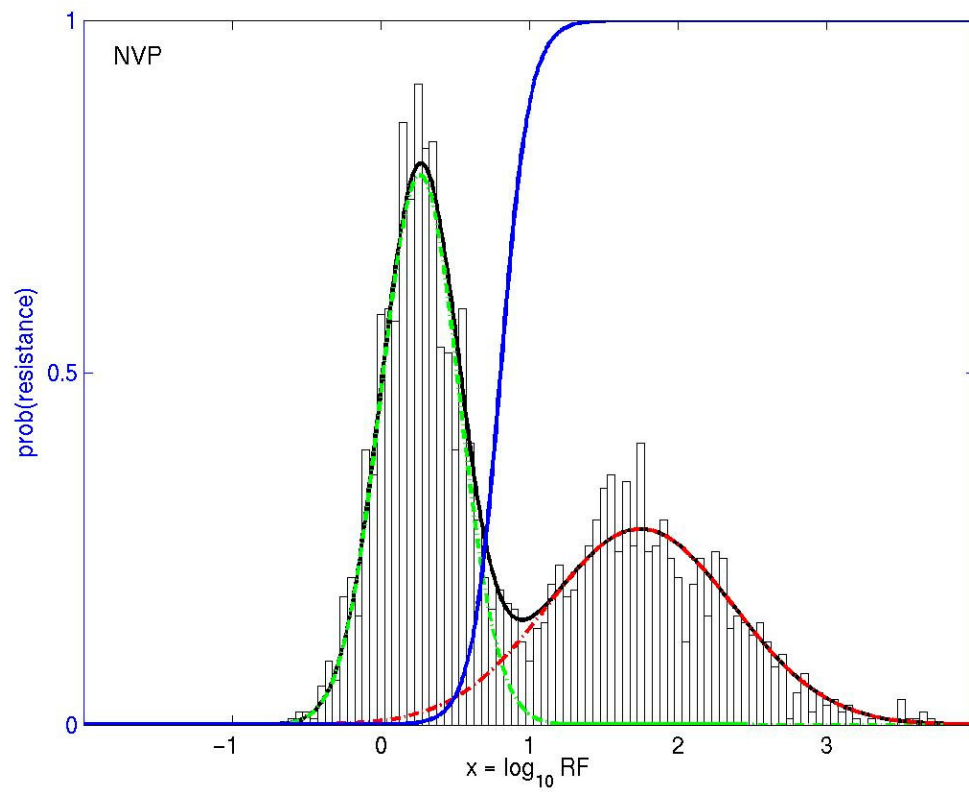

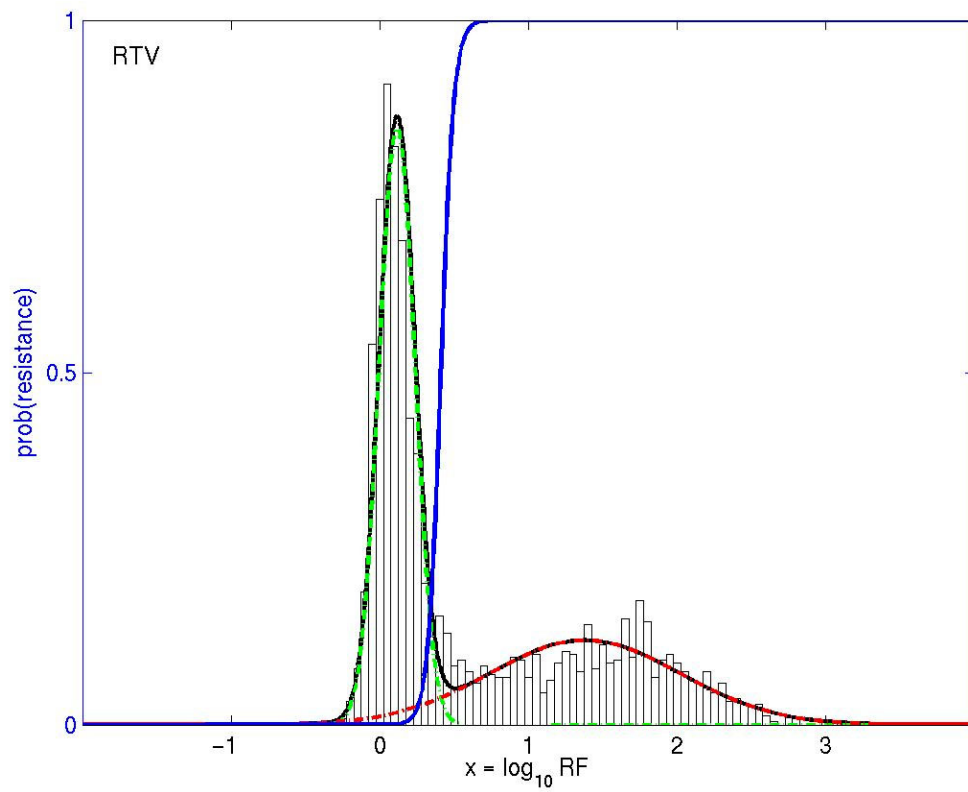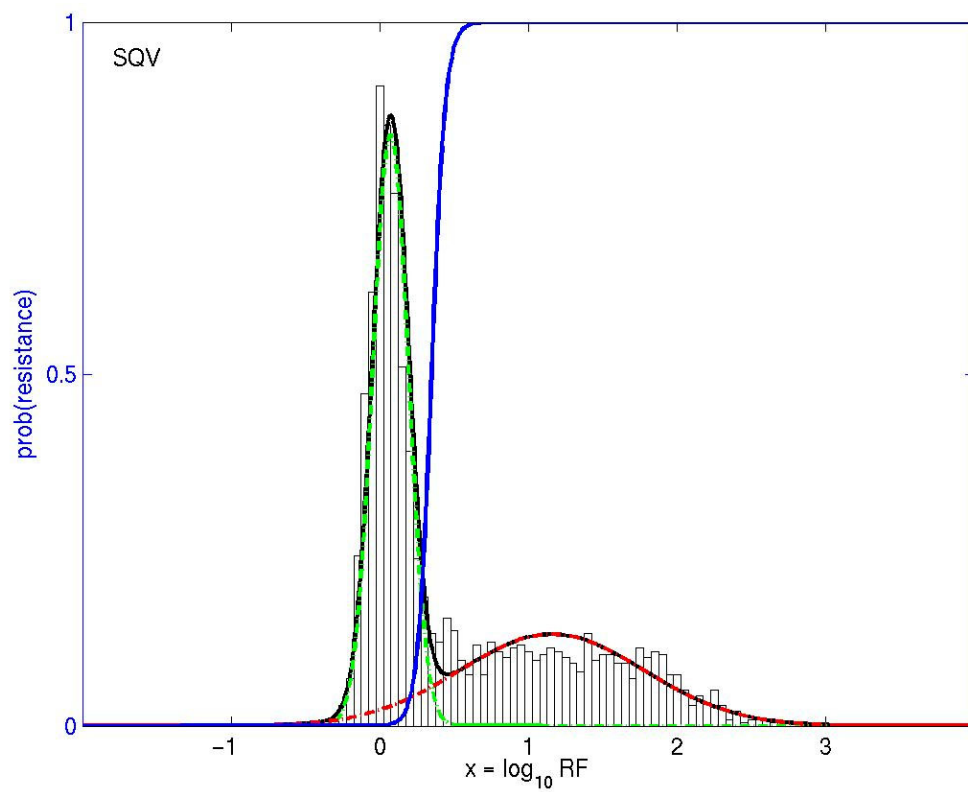

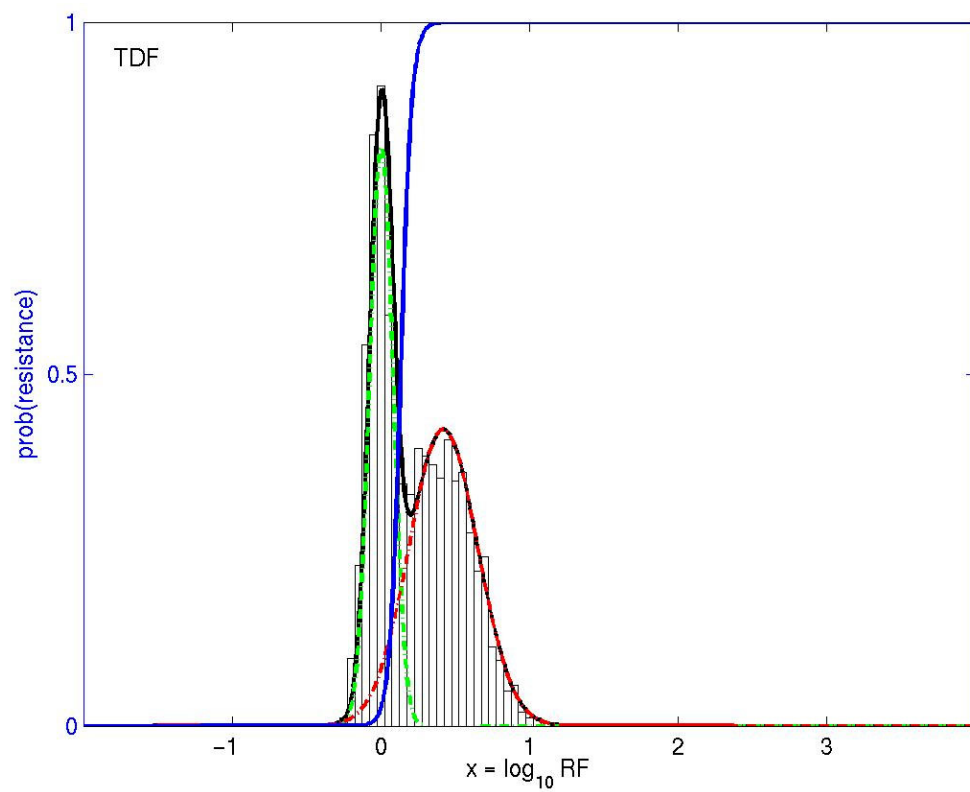

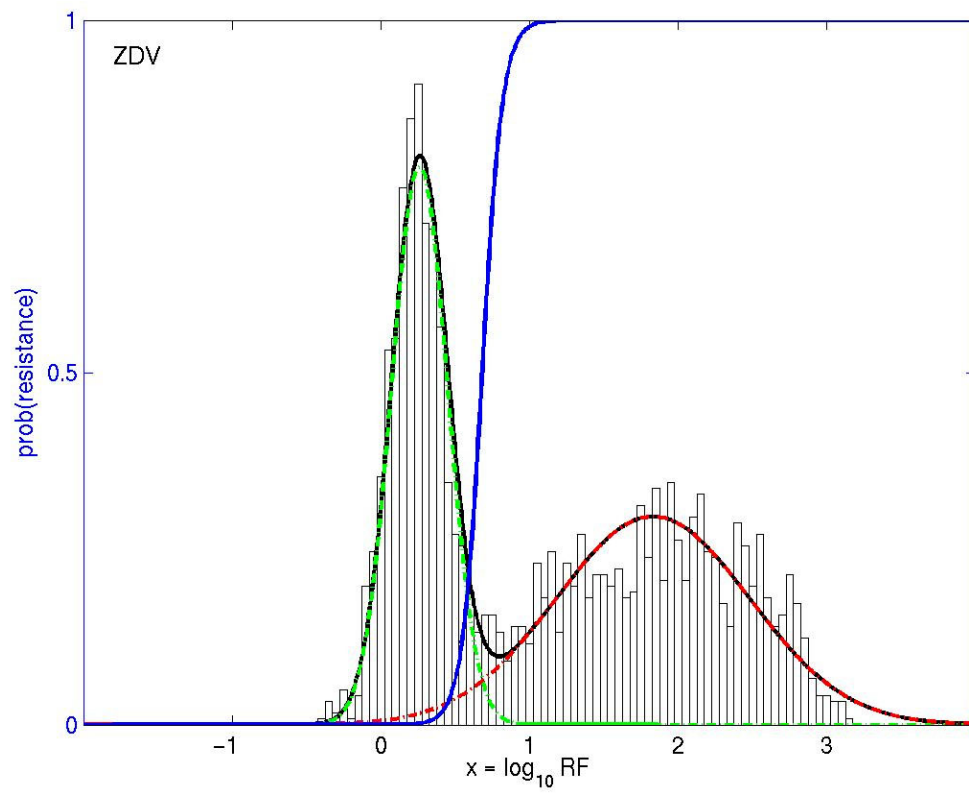

Supplement: nar_31_13_3850__1.pdf [file nar_31_13_3850__1.pdf]

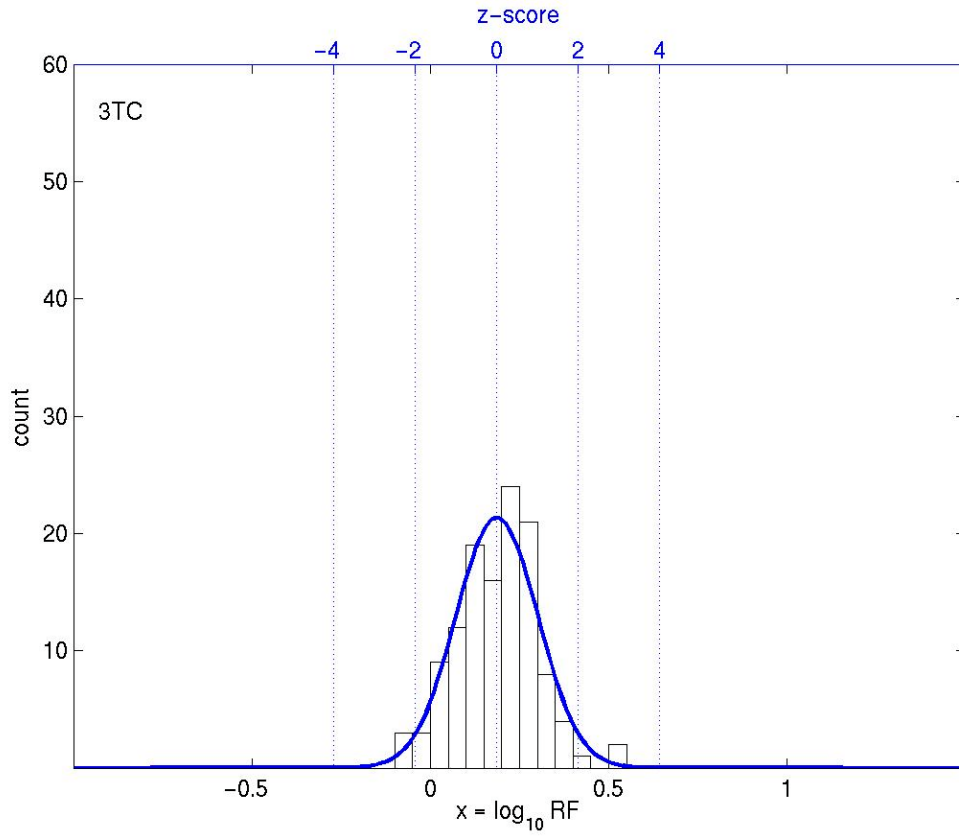

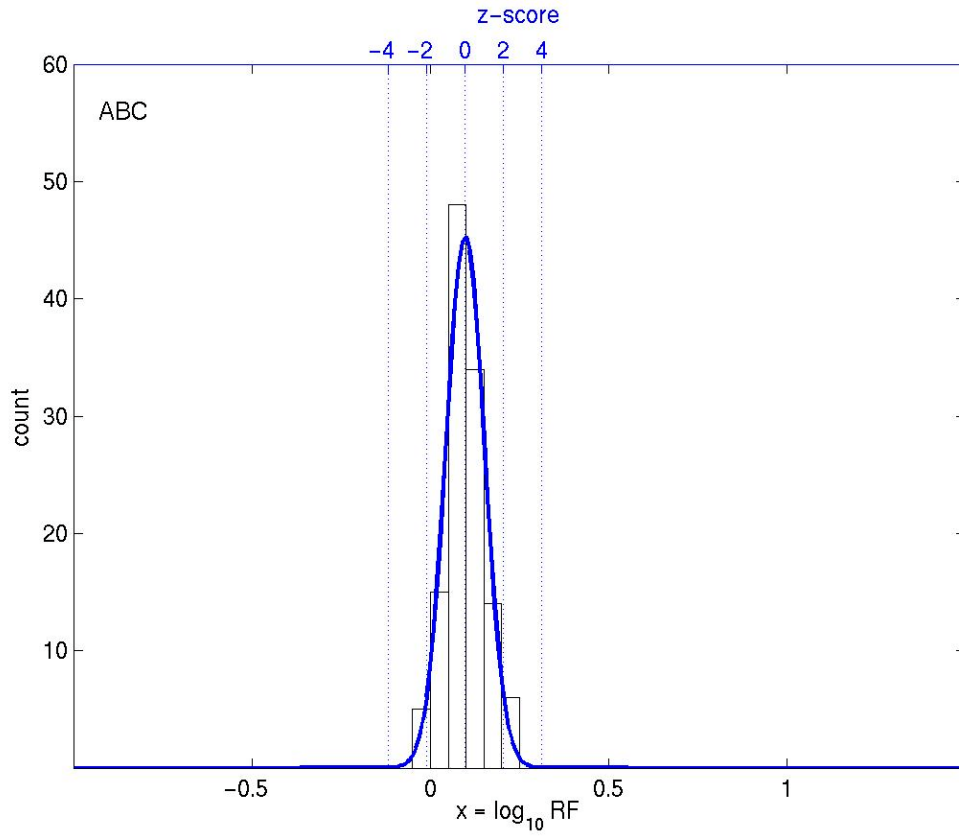

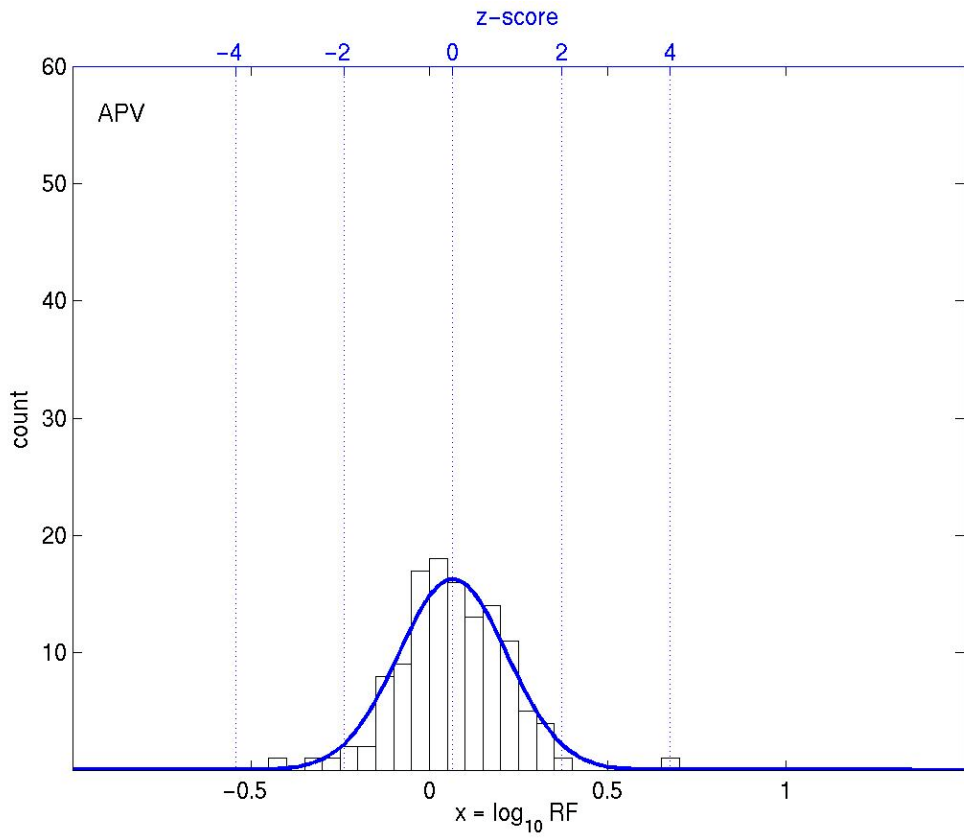

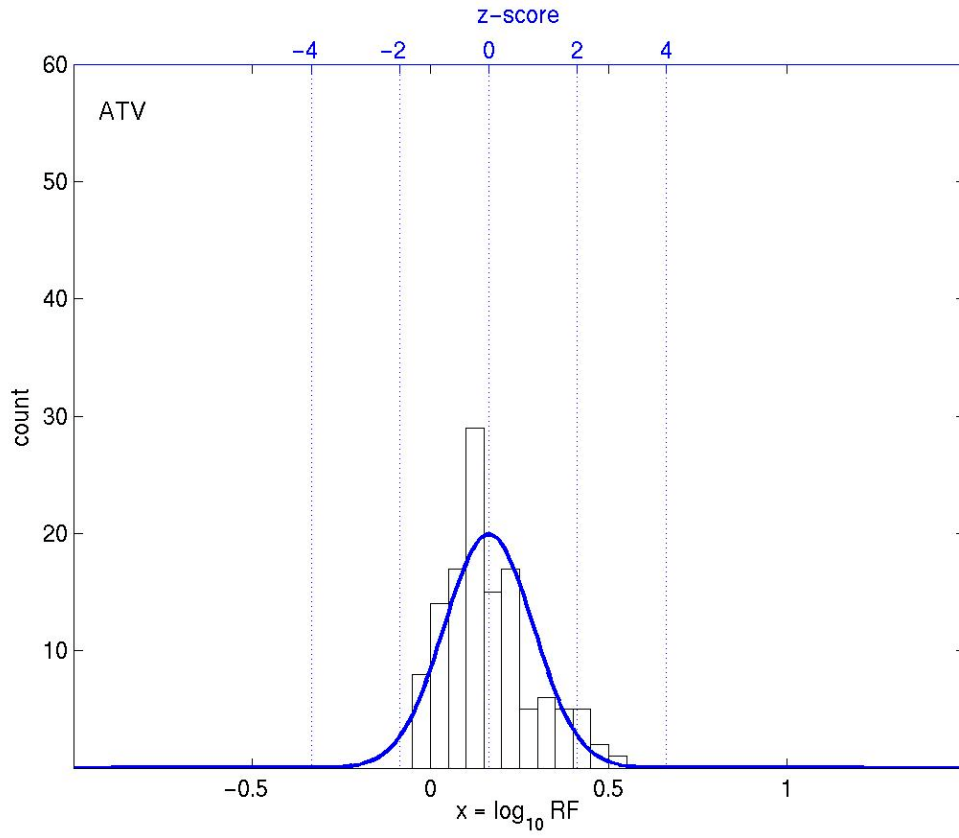

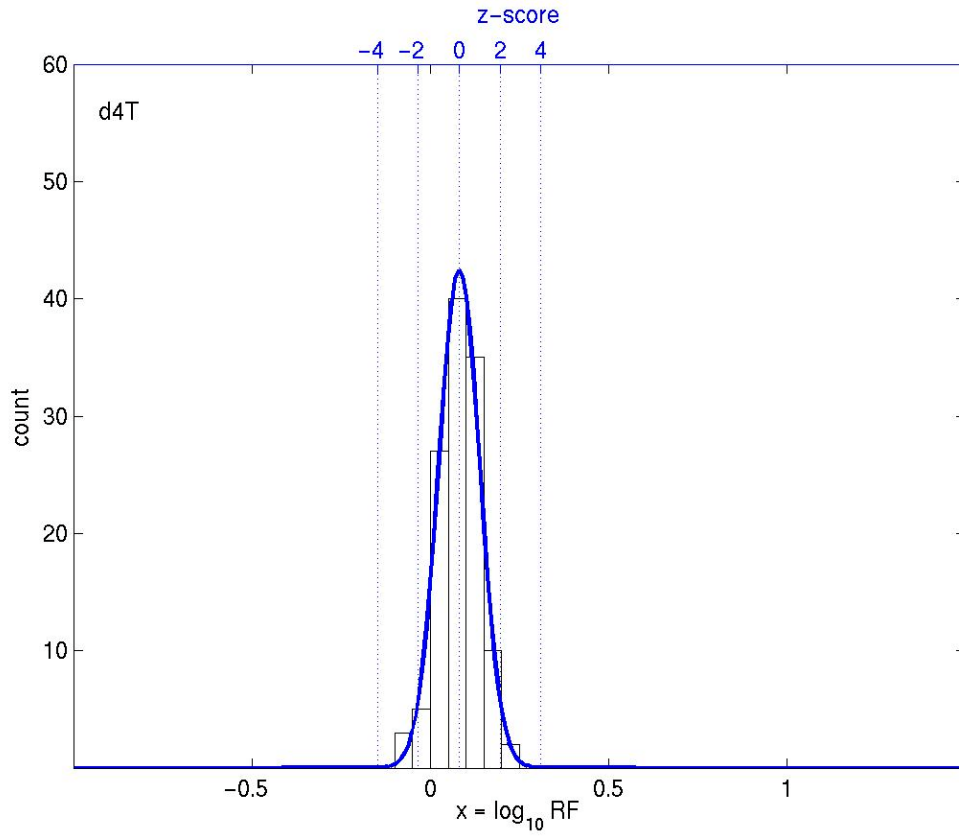

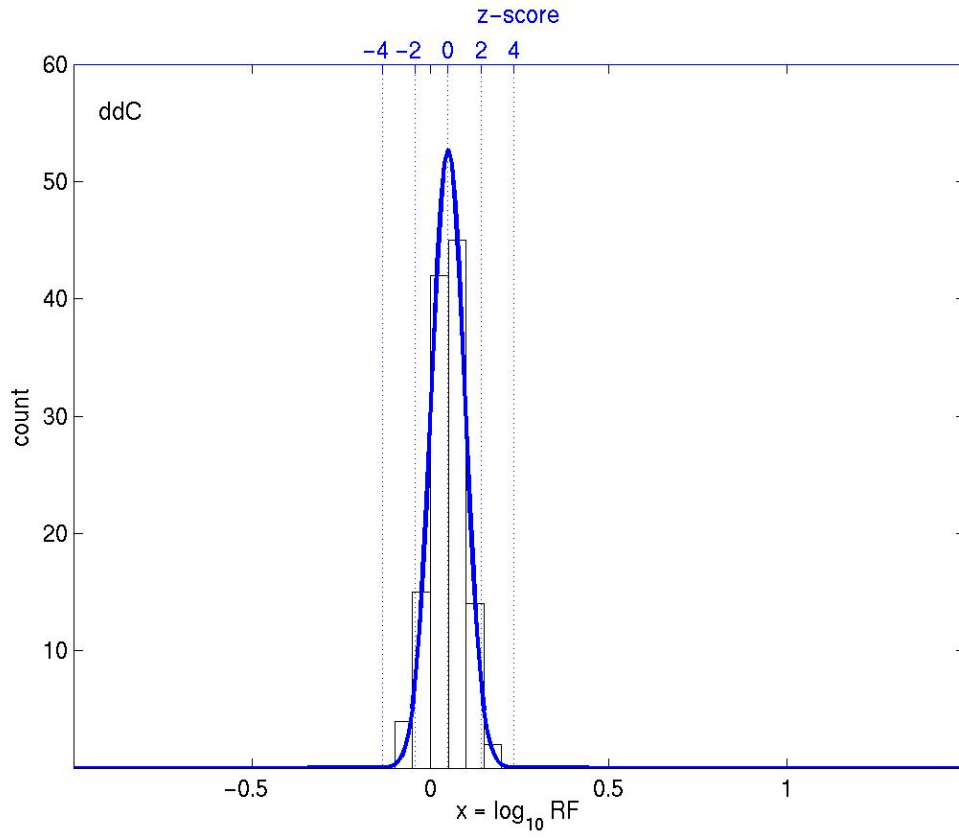

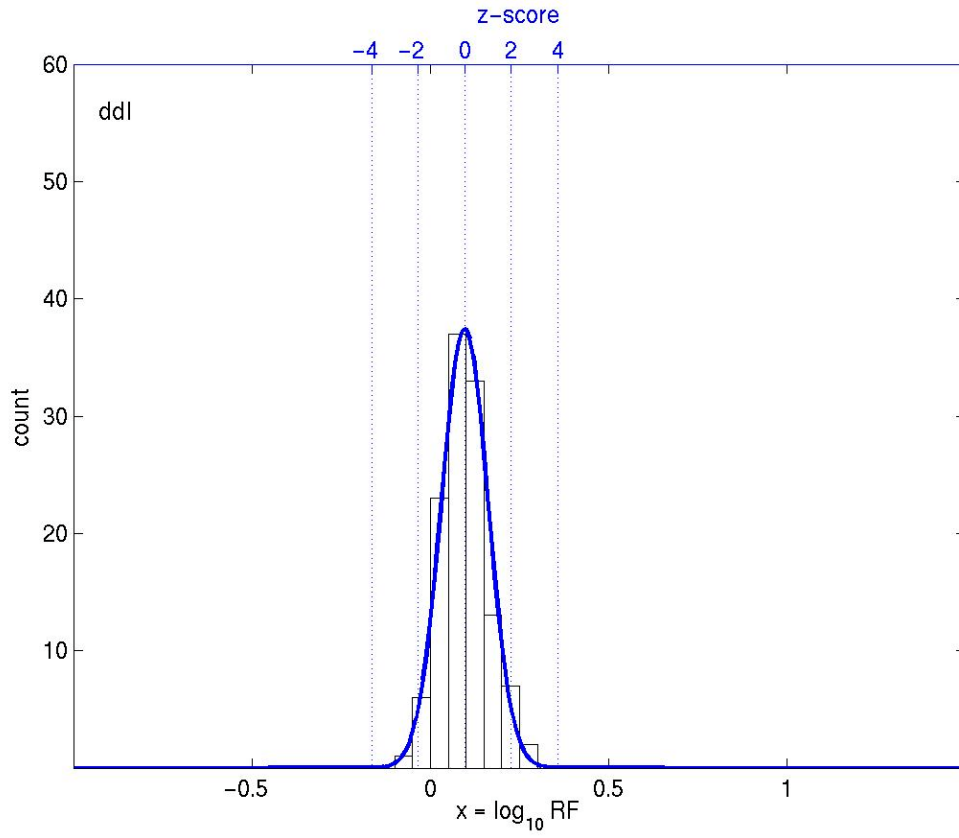

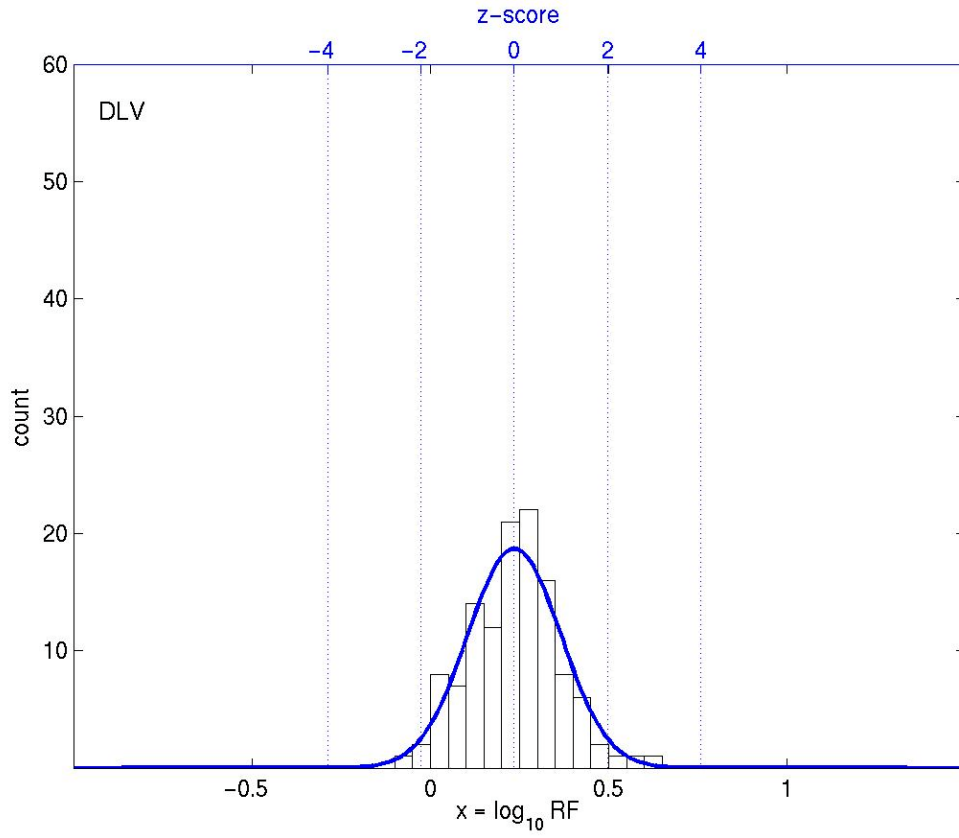



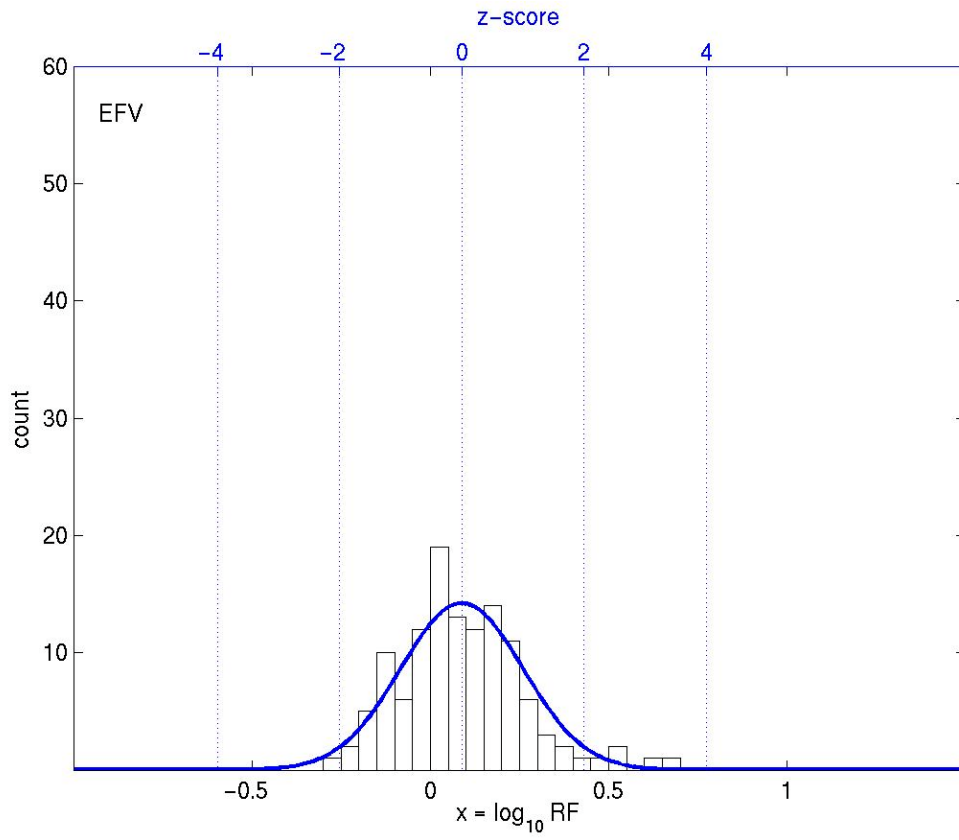

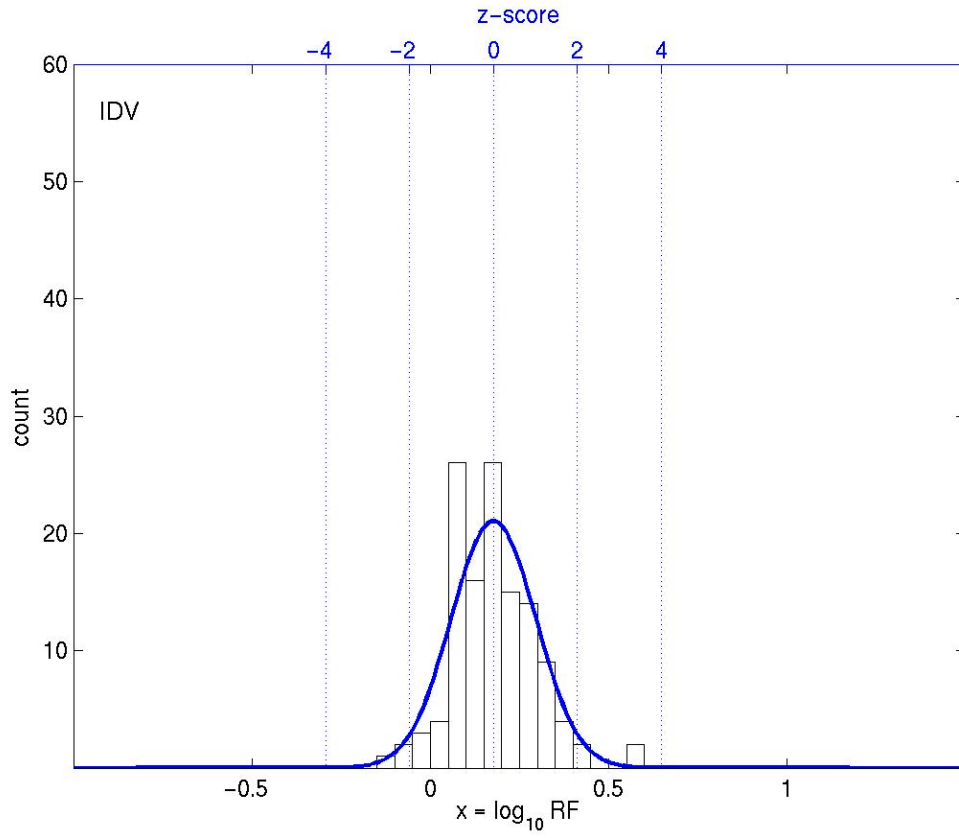

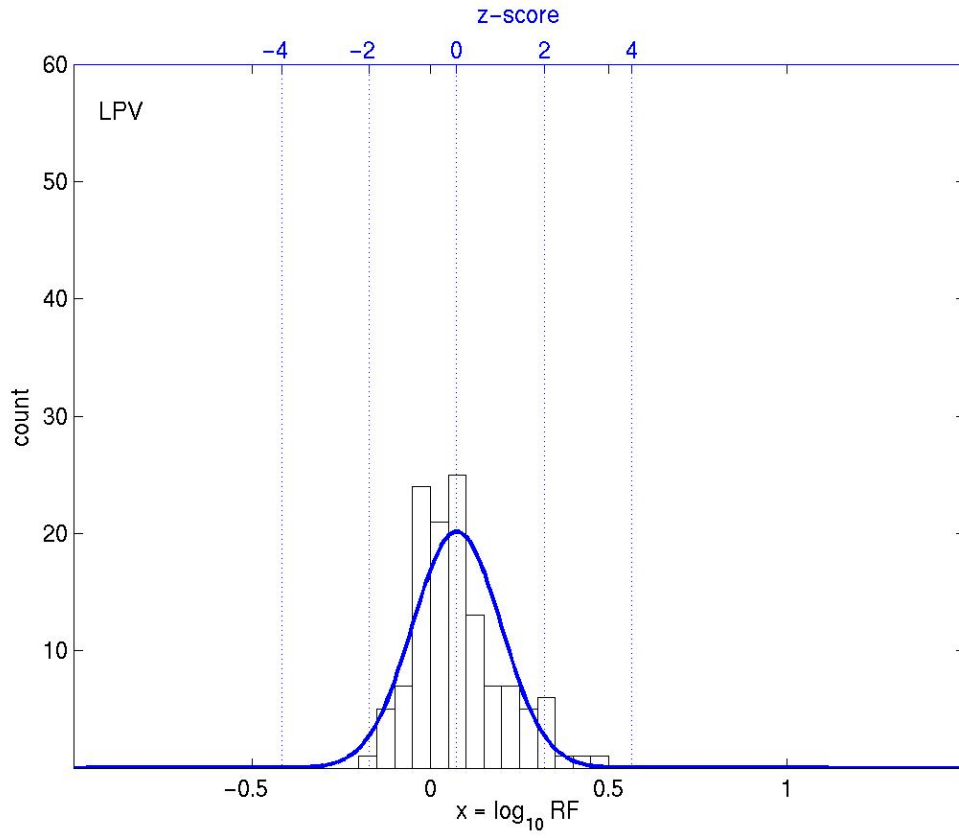

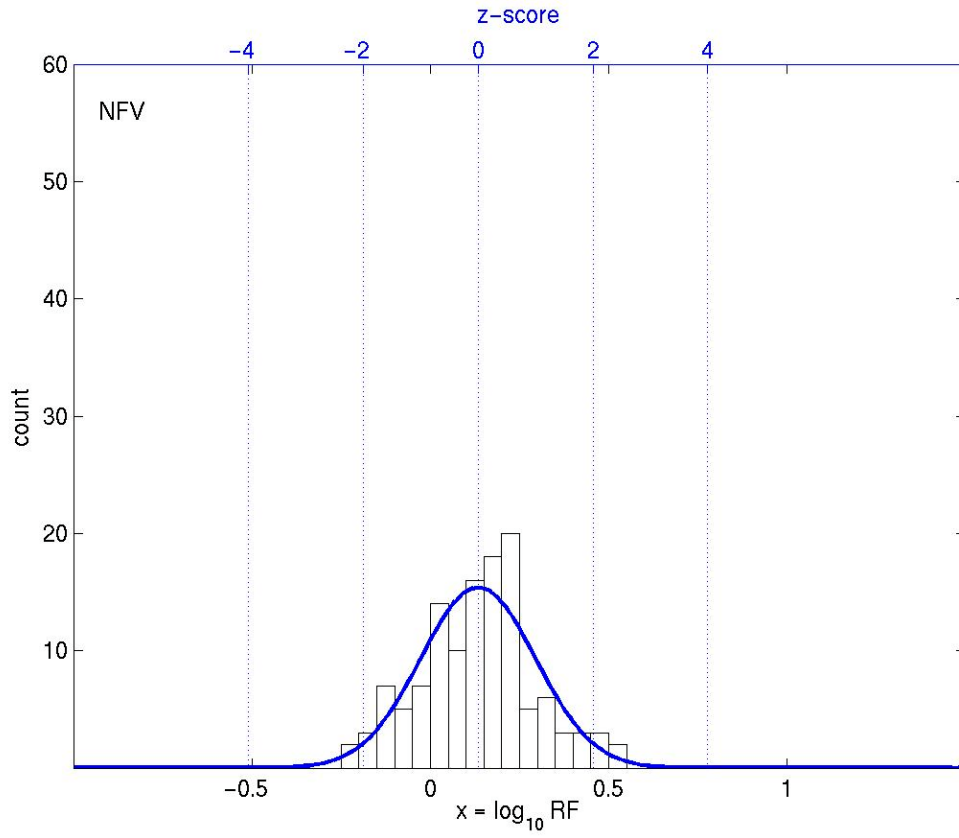

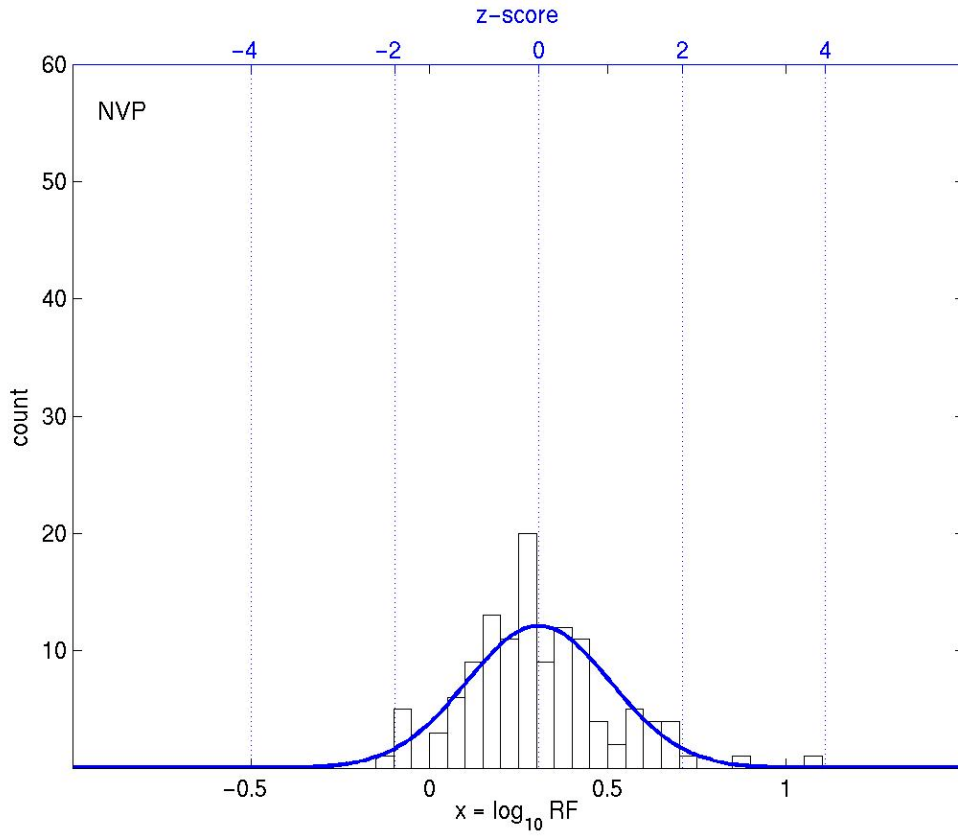

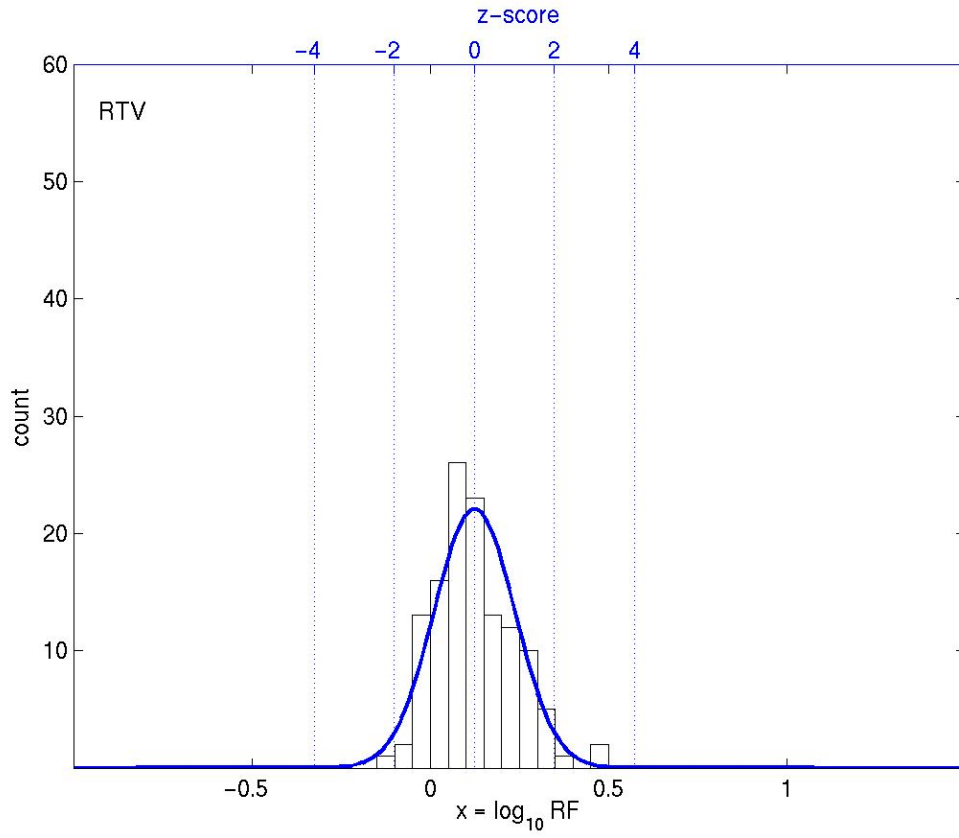

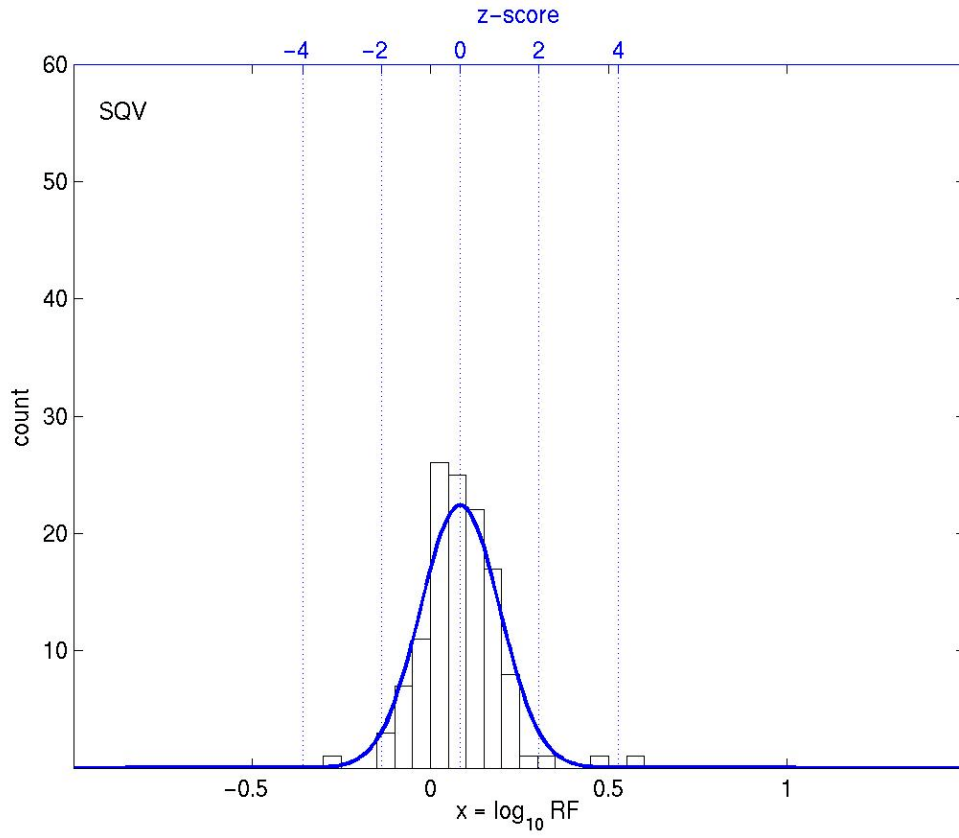

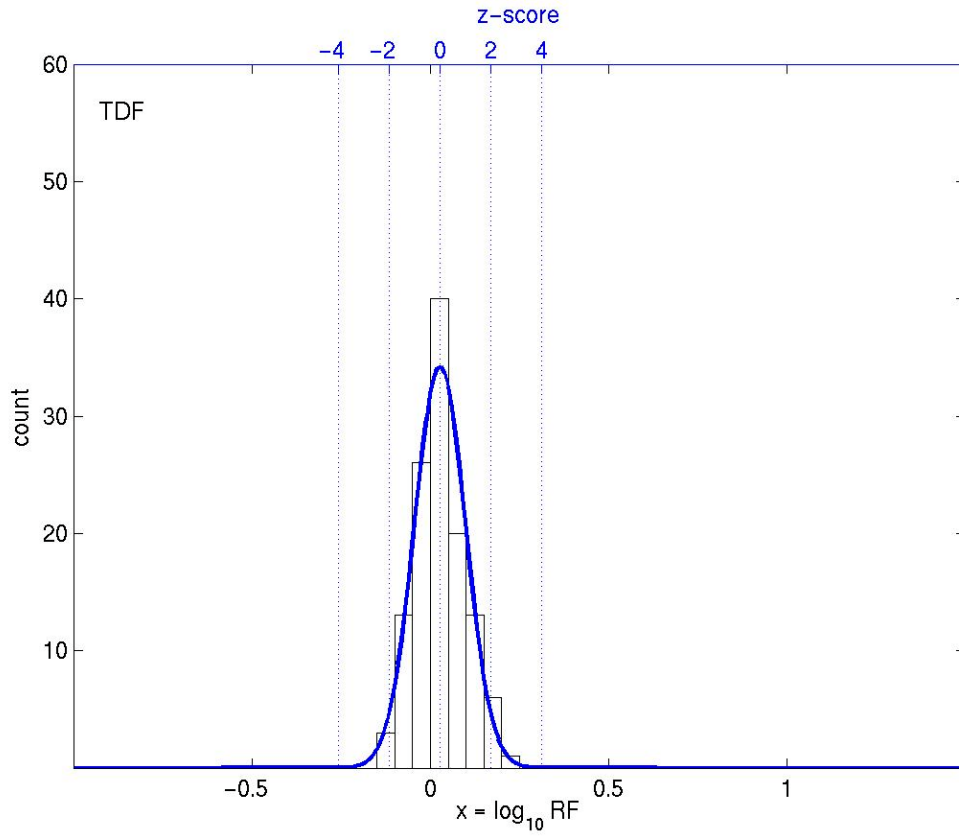



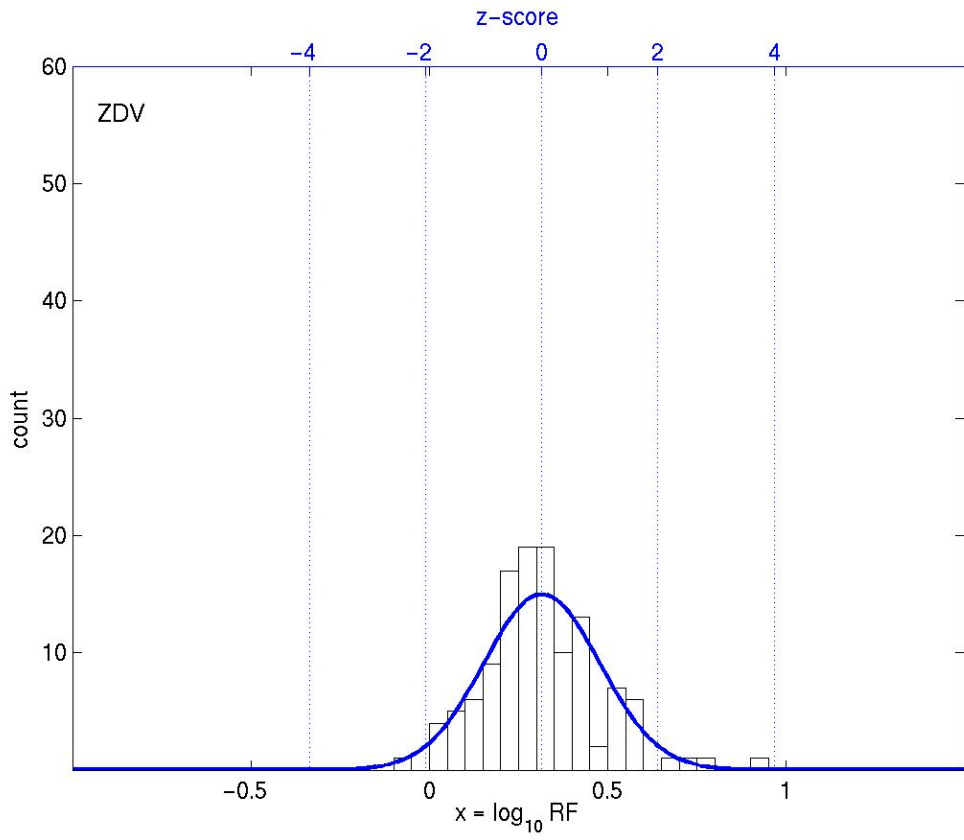

Supplement: nar_31_13_3850__2.pdf [file nar_31_13_3850__2.pdf]
